# Supplementary material for: Ag nanoparticles–anchored reduced graphene oxide catalyst for oxygen electrode reaction in aqueous electrolytes and also a non-aqueous electrolyte for Li–O2 cells
Source: Royal Society of Chemistry journal article supplement (doi:10.1039/c4cp02858a), 2014-01-01
Supplement: c4cp02858a1.pdf [file c4cp02858a1.pdf]

**Supplementary Information (SI)**

**Ag nanoparticles anchored reduced graphene oxide catalyst for oxygen electrode reaction in aqueous electrolytes and also a non-aqueous electrolyte for Li-O<sub>2</sub> cells**

Surender Kumar<sup>a</sup>, C. Selvaraj<sup>a</sup>, L. G. Scanlon<sup>b</sup> and N. Munichandraiah<sup>\*a</sup>

<sup>a</sup>*Department of Inorganic and Physical Chemistry, Indian Institute of Science – 560012*

<sup>b</sup>*Air Force Research Laboratory, Electrical Systems Branch, Wright-Patterson Air Force Base, Ohio 45433, USA*

\*Email: [muni@ipc.iisc.ernet.in](mailto:muni@ipc.iisc.ernet.in) (corresponding author)

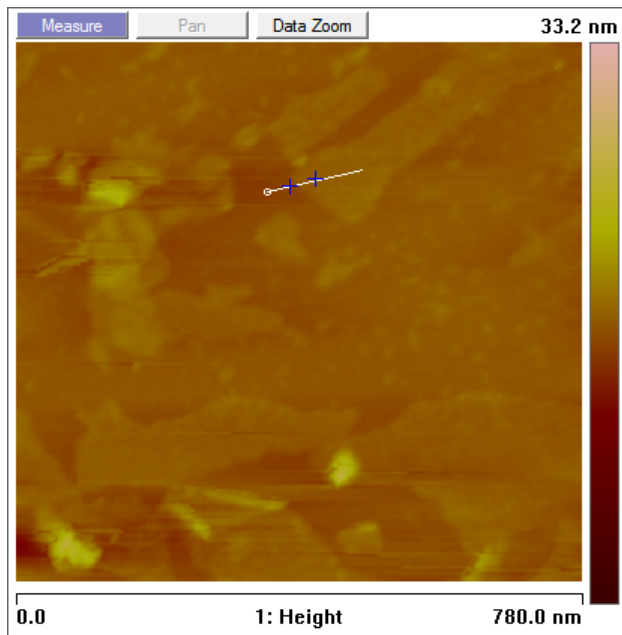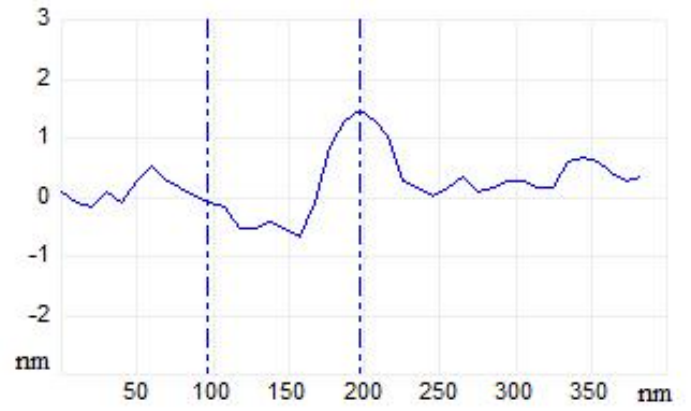

Fig. SI 1(a). AFM image of the RGO.

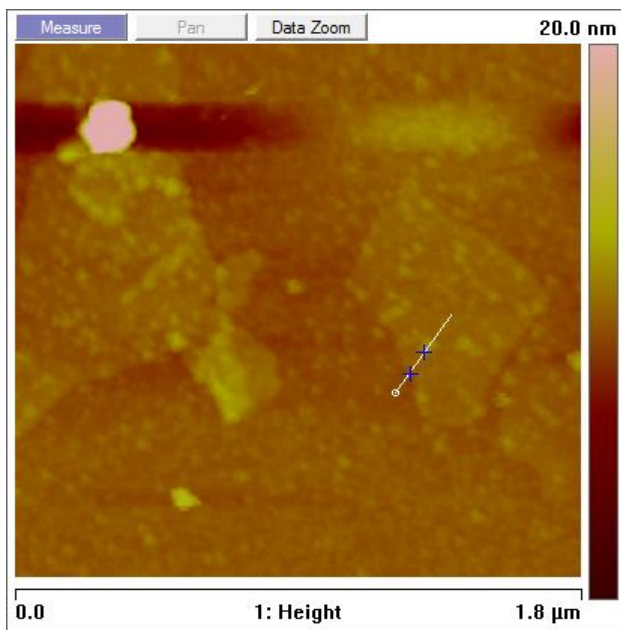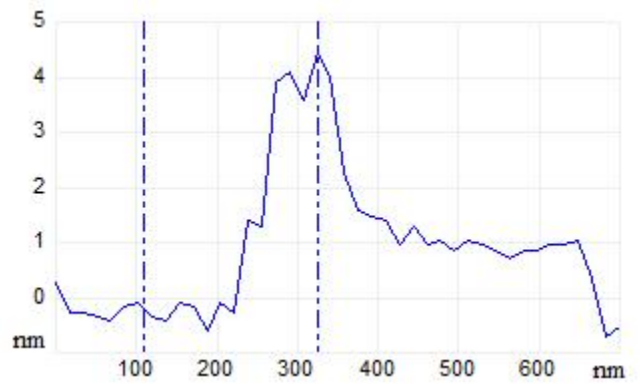

Fig. SI 1 (b). AFM image of the Ag-RGO composite.

| Wave number<br>( $\text{cm}^{-1}$ ) | Bond |
|-------------------------------------|------|
| 1029                                | C-O  |
| 1222                                | C-OH |
| 1580                                | C=C  |
| 1729                                | C=O  |
| 3260                                | O-H  |

Table SI 1. IR band positions and the corresponding assignment.

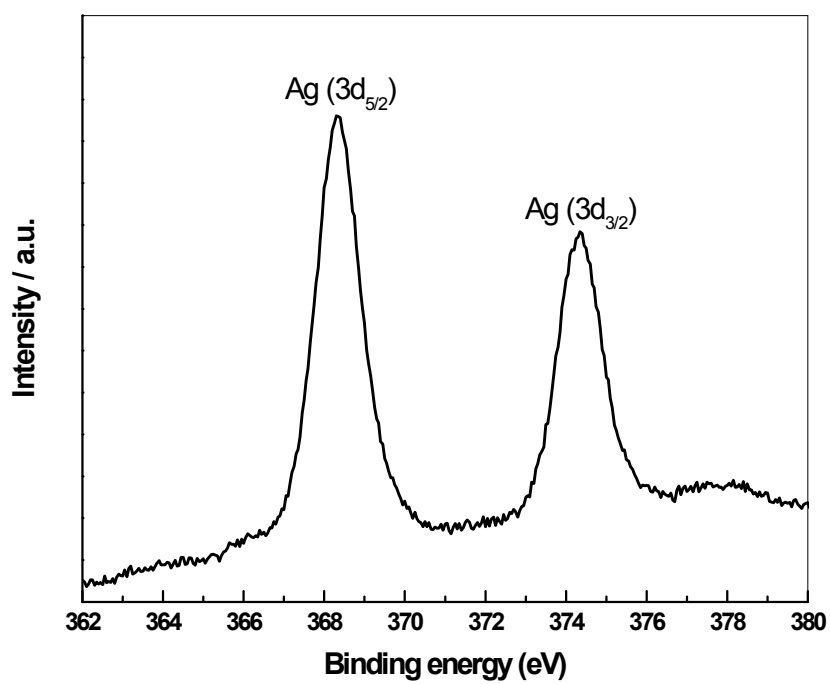

Fig. SI 2. XPS spectra of Ag-RGO (Ag 3d region)

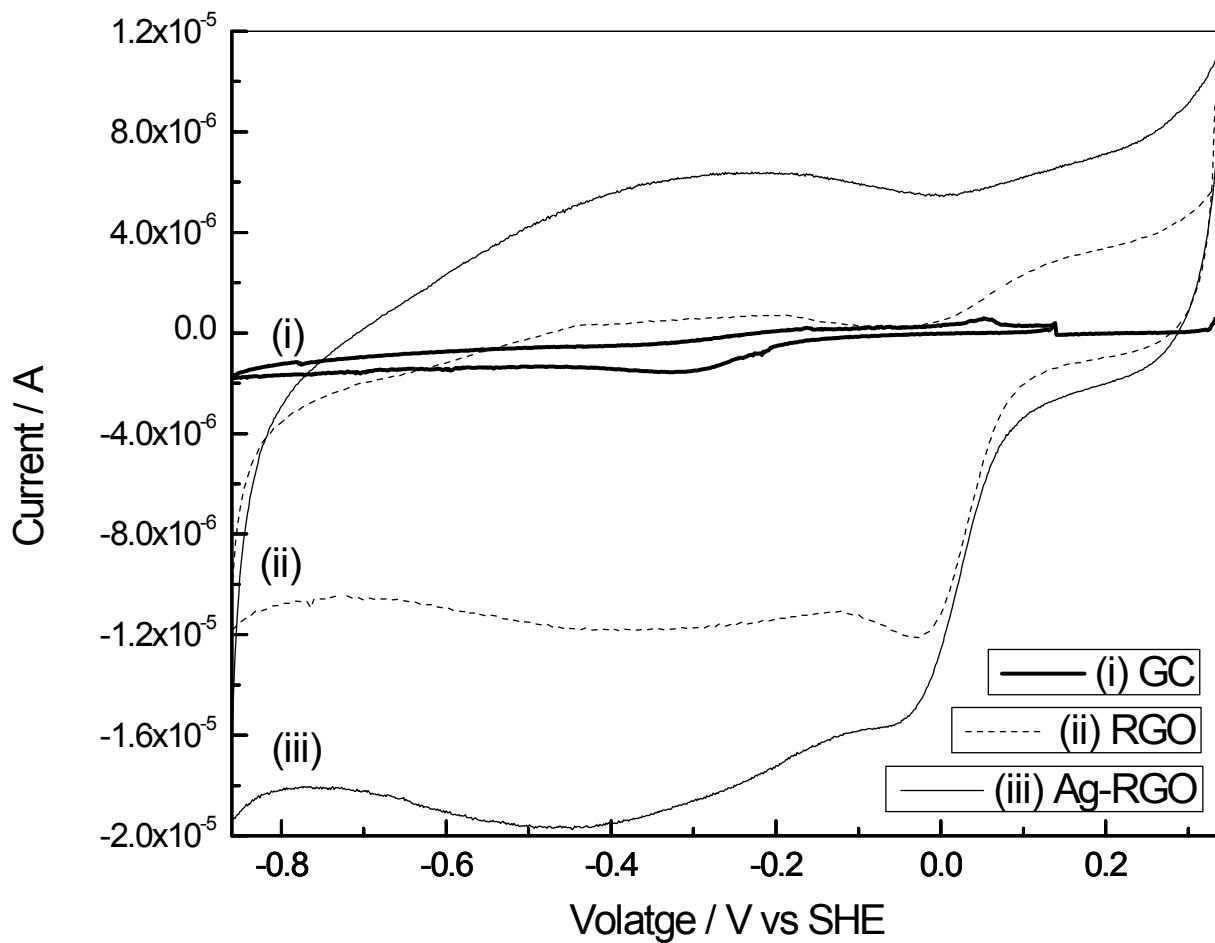

Fig. SI 3. Cyclic voltammograms of ORR on GC, RGO and Ag-RGO at 10 mV s<sup>-1</sup> in 1M KOH saturated with O<sub>2</sub>.

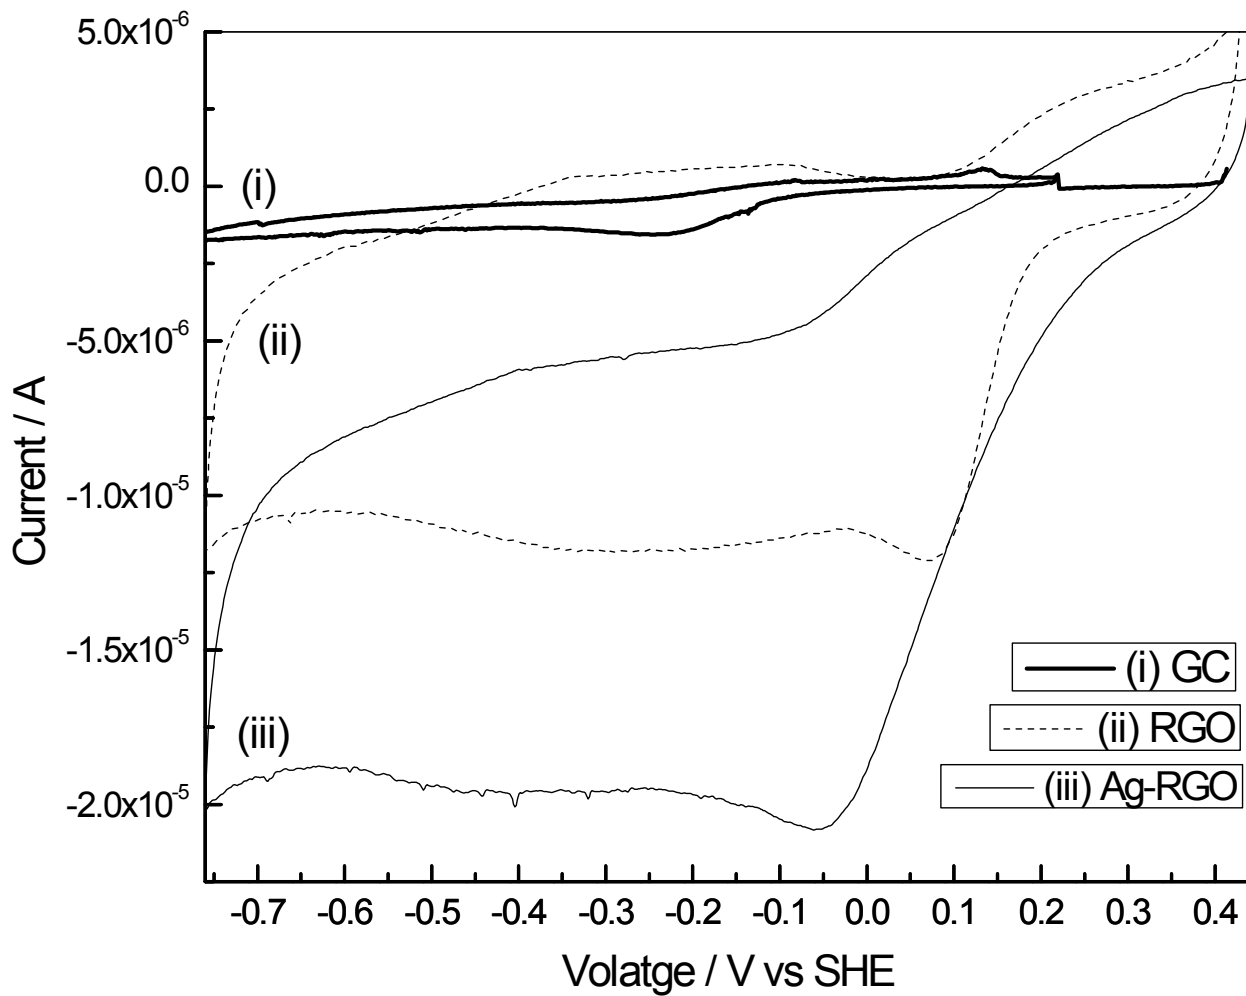

Fig. SI 4. Cyclic voltammograms of ORR on GC, RGO and Ag-RGO at  $10 \text{ mV s}^{-1}$  in  $0.1 \text{ M K}_2\text{SO}_4$  saturated with  $\text{O}_2$ .

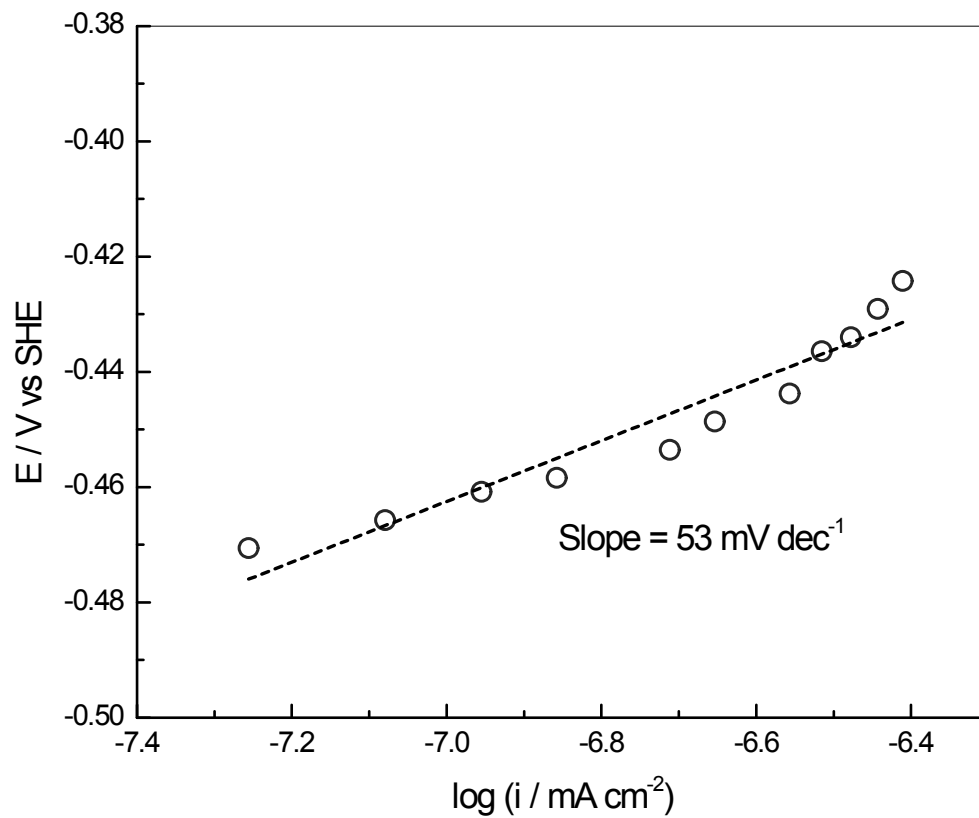

Fig. SI 5. Tafel plot for ORR in 1M TBAP-DMSO (Rotation = 200 rpm, scan rate 10 mV s<sup>-1</sup>).

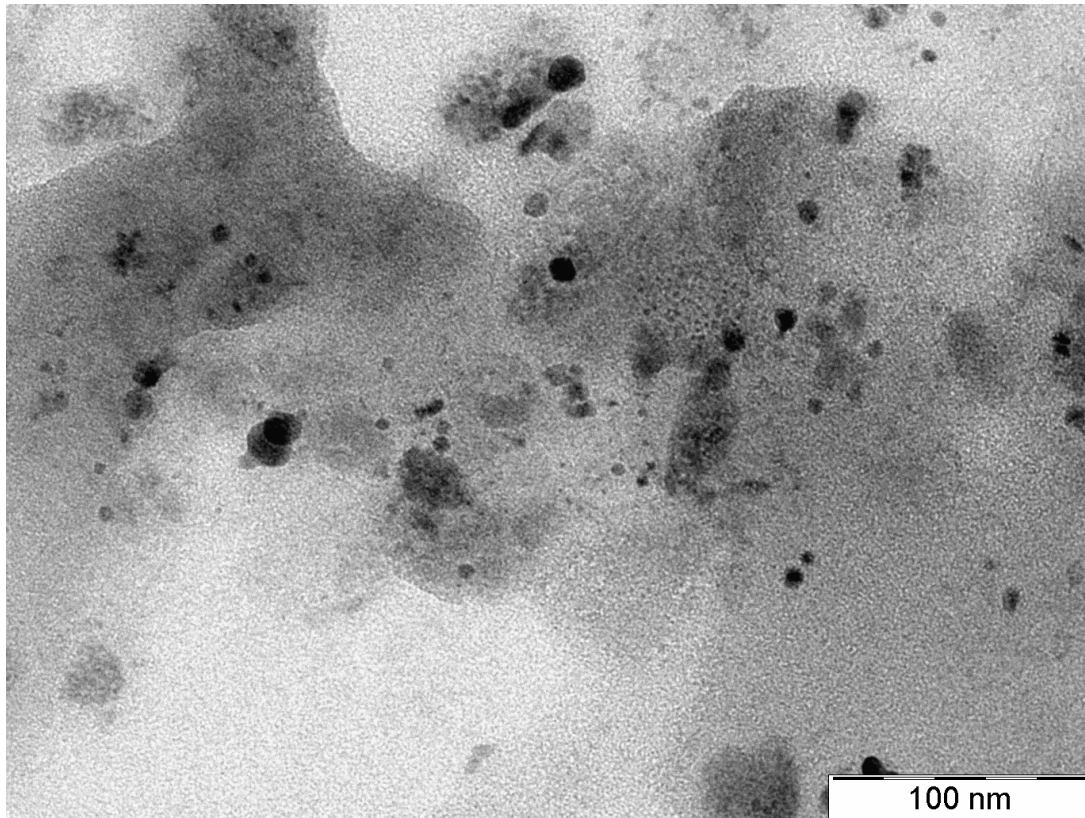

Fig. SI 6. TEM image of Ag-RGO after five charge-discharge cycles.
